# Supplementary material for: Household Air Pollution and Respiratory Health in Rural Crete, Greece: A Cross-Sectional FRESH AIR Study
Source: MDPI journal article supplement (doi:10.3390/atmos12111369), 2021-10-20
Supplement: s1 [file s1]

## Supplementary Material

# Household Air Pollution and Respiratory Health in Rural Crete, Greece: A Cross-Sectional FRESH AIR Study

Marilena Anastasaki <sup>1,\*</sup>, Ioanna Tsiligianni <sup>1</sup>, Dimitra Sifaki-Pistolla <sup>1</sup>, Vasiliki Eirini Chatzea <sup>1</sup>, Andreas Karelis <sup>1</sup>, Antonios Bertias <sup>1</sup>, Niels H. Chavannes <sup>2</sup>, Frederik van Gemert <sup>3</sup>, Christos Lionis <sup>1</sup> and the FRESH AIR Collaborators

<sup>1</sup> Clinic of Social and Family Medicine, School of Medicine, University of Crete, 700 13 Heraklion, Crete, Greece; i.tsiligianni@uoc.gr (I.T.); spdimi11@gmail.com (D.S.-P.); valchatz@hotmail.com (V.E.C.); a.karelis@med.uoc.gr (A.K.); antonisbertias@yahoo.gr (A.B.); lionis@galinos.med.uoc.gr (C.L.)

<sup>2</sup> Department of Public Health and Primary Care, Leiden University Medical Center, 2333 ZA Leiden, The Netherlands; n.h.chavannes@lumc.nl

<sup>3</sup> Department of General Practice, University Medical Center Groningen, 9713 GZ Groningen, The Netherlands; f.a.van.gemert@umcg.nl

\* Correspondence: anastasakimarilena@yahoo.gr; Tel: +30-2810-394613; Fax: +30-2810-394861

**Table S1.** Differences in environmental outcomes between smoking and non-smoking households at baseline and follow-up in Crete, Greece.

| Exposures                                                | Indoor smoking (baseline) |             |          | Indoor smoking (follow-up) |             |          |
|----------------------------------------------------------|---------------------------|-------------|----------|----------------------------|-------------|----------|
|                                                          | Yes (N = 10)              | No (N = 22) | p-value* | Yes (N = 6)                | No (N = 24) | p-value* |
| <b>PM<sub>2.5</sub> (µg/m<sup>3</sup>), median (IQR)</b> | 54.5(45.8)                | 26.4 (17.9) | 0.12     | 81.8 (229.7)               | 22.4 (19.6) | 0.09     |
| <b>CO (ppm), median (IQR)</b>                            | 0.8 (2.1)                 | 0 (0.3)     | 0.22     | 0.5 (1.6)                  | 0 (0.2)     | 0.32     |
| <b>CO max (ppm), median (IQR)</b>                        | 16 (88.6)                 | 12.3 (23.4) | 0.43     | 14.3 (20.4)                | 3.3 (10.1)  | 0.07     |

\*Mann–Whitney test.

**Table S2.** Differences in selected symptoms between people with any comorbidities versus without, at baseline and follow-up in Crete, Greece.

| Comorbidities (baseline)       |            |              |                   | Comorbidities (follow-up) |              |                   |
|--------------------------------|------------|--------------|-------------------|---------------------------|--------------|-------------------|
| General symptoms               | No (N = 8) | Yes (N = 33) | p-value*          | No (N = 4)                | Yes (N = 37) | p-value*          |
| <hr/>                          |            |              |                   |                           |              |                   |
| <b>Cough</b>                   |            |              |                   |                           |              |                   |
| <i>No</i>                      | 5          | 28           | 0.15 <sup>a</sup> | 4                         | 37           | -                 |
| <i>Yes</i>                     | 3          | 5            |                   | 0                         | 0            |                   |
| <b>Phlegm</b>                  |            |              |                   |                           |              |                   |
| <i>No</i>                      | 7          | 33           | 0.04 <sup>b</sup> | 4                         | 37           | -                 |
| <i>Yes</i>                     | 1          | 0            |                   | 0                         | 0            |                   |
| <b>Breathlessness</b>          |            |              |                   |                           |              |                   |
| <i>No</i>                      | 8          | 28           | 0.24 <sup>b</sup> | 4                         | 37           |                   |
| <i>Yes</i>                     | 0          | 5            |                   | 0                         | 0            |                   |
| <hr/>                          |            |              |                   |                           |              |                   |
| <b>Symptoms during heating</b> |            |              |                   |                           |              |                   |
| <b>Cough</b>                   |            |              |                   |                           |              |                   |
| <i>No</i>                      | 8          | 33           | -                 | 4                         | 35           | 0.63 <sup>c</sup> |
| <i>Yes</i>                     | 0          | 0            |                   | 0                         | 2            |                   |
| <b>Breathlessness</b>          |            |              |                   |                           |              |                   |
| <i>No</i>                      | 8          | 33           | -                 | 4                         | 35           | 0.63 <sup>c</sup> |
| <i>Yes</i>                     | 0          | 0            |                   | 0                         | 2            |                   |
| <b>Fatigue</b>                 |            |              |                   |                           |              |                   |
| <i>No</i>                      | 8          | 33           | -                 | 3                         | 30           | 0.77 <sup>b</sup> |
| <i>Yes</i>                     | 0          | 0            |                   | 1                         | 7            |                   |
| <b>Headache</b>                |            |              |                   |                           |              |                   |
| <i>No</i>                      | 8          | 33           | -                 | 3                         | 28           | 0.98 <sup>b</sup> |
| <i>Yes</i>                     | 0          | 0            |                   | 1                         | 9            |                   |

\* $\chi^2$  test, <sup>a</sup>1 cell (25%) has exp count <5, <sup>b</sup>2 cells (50%) have exp count <5, <sup>c</sup>3 cells (75%) have exp count <5.
